# Supplementary material
Source: publisher site journal article supplement (https://www.dovepress.com/article/286102)
Supplement: Supplementary file 1 [file get_supplementary_file.php]

Supplementary Table 1 Statistical analysis used for demographic characteristics of all subjects. *Related to the Methods section and table 1.*

|  | Normal Distribution (Shapiro Wilks test) | Equal Variance (F-test or Levine’s test) | Statistical test | Post hoc test |
| --- | --- | --- | --- | --- |
| Gender |  |  | Chi-Square test | paired comparisons |
| Age (years) | * | * | Kruskal-Wallis ANOVA test | paired comparisons |
| Education years | * |  | Kruskal-Wallis ANOVA test | paired comparisons |
| BMI | * |  | Kruskal-Wallis ANOVA test | paired comparisons |
| Verbal IQ | * | * | Kruskal-Wallis ANOVA test | paired comparisons |
| Performance IQ | * | * | Kruskal-Wallis ANOVA test | paired comparisons |
| Full-scale IQ |  |  | One-Way ANOVA test | Bonferroni |
| Relative *COMT* expression |  | * | Welch's ANOVA test | Tamhane’s T2 |

* indicate P<0.05.

Supplementary Table 2 Statistical analysis used for demographic characteristics of subjects with *COMT* expression data. *Related to the Methods section and table 2.*

| sTable2 | Normal Distribution (Shapiro Wilks test) | Equal Variance (F-test or Levine’s test) | Statistical test | Post hoc test |
| --- | --- | --- | --- | --- |
| Gender |  |  | Chi-Square test | paired comparisons |
| Age (years) | * | * | Kruskal-Wallis test | paired comparisons |
| Education years | * |  | Kruskal-Wallis test | paired comparisons |
| BMI | * |  | Kruskal-Wallis ANOVA test | paired comparisons |
| Verbal IQ | * | * | Kruskal-Wallis test | paired comparisons |
| Performance IQ | * | * | Kruskal-Wallis test | paired comparisons |
| Full-scale IQ |  |  | One-Way ANOVA test | Bonferroni |
| Relative *COMT* expression |  | * | Welch's ANOVA test | Tamhane’s T2 |

* indicate P<0.05.
